# Supplementary material
Source: publisher figshare collection journal article supplement (https://gsajournals.figshare.com/ndownloader/files/12404531)
Supplement: Supplementary file 1 [file 12404531]

## Sheet: Sheet1
Table S5: Cse4 Peaks observed in wild type and hir2∆ strains overexpressing Cse4. The chromosomal location and SICER score of Cse4 peaks found in wild type strain from the ChIP-seq experiment.
chromosome	start	end	SICER score
chrXIII	267450	268849	769.906
chrIV	449400	450099	704.836
chrII	275600	278349	440.748
chrV	151100	153549	402.574
chrI	150800	151999	397.064
chrXIV	628400	629449	381.188
chrII	237850	238749	357.101
chrXII	290200	292049	347.718
chrVIII	105250	106449	345.365
chrXV	986700	989599	321.046
chrX	435400	436999	286.413
chrIII	114100	114999	269.125
chrVII	882350	883649	261.466
chrI	139450	141349	257.641
chrXII	150300	151299	247.368
chrVIII	451350	453249	237.792
chrXII	95550	97349	231.704
chrXI	439450	440549	222.305
chrXI	66950	69049	212.305
chrIX	355300	355999	210.375
chrVI	148000	149349	196.743
chrXIII	652350	653799	195.812
chrXVI	555800	556749	185.526
chrIX	248550	249699	182.133
chrXVI	700650	701999	180.831
chrIII	122400	123899	176.521
chrXV	326300	327299	171.573
chrXIII	305800	307149	152.101
chrXI	258050	259499	151.701
chrXI	230150	231649	150.006
chrXVI	95000	97049	147.69
chrII	680100	681049	145.277
chrII	477700	478999	144.711
chrV	558900	559449	140.436
chrV	441850	442849	140.249
chrXV	108700	110199	136.295
chrVII	384050	385549	134.263
chrXI	517850	519299	133.158
chrII	408300	409099	131.793
chrXVI	644750	645849	126.453
chrVIII	121550	122699	124.296
chrXIV	197750	199149	117.341
chrX	120450	121999	116.954
chrIV	550400	551649	115.974
chrIV	410300	411499	115.162
chrV	68950	70149	109.585
chrXI	462900	464149	109.491
chrVII	471800	473149	109.214
chrIV	1525450	1526249	109.121
chrV	86350	87199	108.506
chrVII	483000	484099	107.504
chrXIV	499700	501099	107.279
chrII	274450	275499	107.228
chrVII	165350	166699	106.833
chrXV	444700	446399	103.358
chrVII	609750	610599	102.418
chrVII	785200	786499	102.361
chrVII	1084200	1085049	102.268
chrI	67950	68999	102.017
chrVI	255400	256849	100.368
chrXII	783850	784799	99.3613
chrVII	546800	548049	99.2685
chrXIII	4750	5799	98.2392
chrVII	700400	701099	97.394
chrXVI	97150	98449	97.3211
chrVIII	561500	562449	96.7495
chrXVI	694700	695899	96.0614
chrXIII	91200	92049	93.9955
chrXIII	352150	353499	93.2476
chrIV	366100	366949	91.2738
chrXIII	634150	634999	89.9749
chrIV	234100	234699	89.1305
chrIX	382400	383749	88.9639
chrVII	856500	857499	88.0191
chrXV	288150	288749	87.7038
chrXI	326500	327499	87.314
chrXII	370350	371349	87.1535
chrIV	562400	563649	86.6058
chrIV	368550	369249	86.3708
chrX	453350	454649	86.0199
chrXIII	556800	557649	83.9896
chrV	473750	475149	83.9682
chrXV	1084400	1085299	82.8163
chrXVI	5950	6599	82.638
chrVII	197250	198149	82.4308
chrXVI	227550	228049	82.2506
chrIII	50500	51999	82.1511
chrVII	999700	1000399	81.9434
chrXIV	631150	632049	81.814
chrXII	65350	65999	81.0651
chrV	311600	312199	79.9413
chrXII	10350	11199	79.8947
chrVIII	0	799	79.8127
chrII	642550	643099	79.12
chrII	251100	251849	78.789
chrV	335050	335899	78.5224
chrXIV	6100	6699	78.3726
chrIX	138800	139649	78.2368
chrVII	496350	496949	77.8769
chrXV	780450	781199	77.0324
chrIV	1490050	1490699	76.9125
chrXIV	354900	356049	76.5539
chrXV	486900	487849	75.1825
chrXII	252600	253599	74.9552
chrIX	197550	197999	74.7038
chrXII	234300	235249	74.4509
chrXII	603550	604249	73.8419
chrIV	1468900	1469499	73.8152
chrXIV	87000	87949	73.8124
chrX	703450	704299	73.0769
chrXIII	773600	774449	72.7431
chrXVI	452950	453949	72.4338
chrIX	422500	423449	72.0399
chrXI	519600	520599	71.9945
chrXIII	100	899	71.9049
chrXIV	652000	652749	71.4589
chrXV	1043550	1044549	71.2092
chrII	341500	342399	71.086
chrXVI	920750	921349	70.9079
chrVII	774250	774849	70.8516
chrXIII	540400	541099	70.8308
chrX	374050	374899	70.4747
chrII	371600	372649	70.3761
chrXII	659800	660499	70.1869
chrXIII	758950	760149	70.1649
chrIV	1013400	1014149	69.0977
chrVIII	115050	115449	69.0136
chrV	192000	192649	68.9725
chrX	150	999	68.8849
chrXV	978750	979349	68.7206
chrXI	428300	429099	68.1405
chrXII	609300	610149	67.8878
chrX	190700	191749	67.6118
chrII	405850	406449	67.3566
chrXV	670600	671849	67.3177
chrXII	8600	9399	67.1453
chrX	662600	663549	66.9812
chrVII	478950	479349	66.877
chrXI	444950	445949	66.5398
chrII	36100	37249	66.4873
chrII	5200	5949	66.0812
chrXV	881600	882549	66.0219
chrXIV	604800	605549	65.9925
chrXII	233300	234199	65.6112
chrXII	808550	809499	65.2323
chrXIII	661750	662549	64.1103
chrXII	722700	723549	63.8992
chrIX	388350	388999	63.8553
chrVII	420450	421099	63.835
chrV	422600	422999	63.3099
chrXIII	347100	347849	62.7909
chrIX	383900	384449	62.3174
chrII	237200	237749	62.0401
chrIV	591750	592199	61.9387
chrVII	766000	766849	61.6546
chrXV	1058550	1059549	61.3646
chrXIV	618600	619499	61.165
chrXII	1065200	1065849	60.9891
chrXV	58150	59099	60.9451
chrXII	369050	369499	60.8542
chrXIII	258800	259249	60.8438
chrXIII	633200	634049	60.6861
chrXII	510200	510949	60.6312
chrXVI	114450	114849	60.5432
chrXVI	431650	432049	59.8813
chrIX	129750	130499	59.7103
chrXV	158800	159449	59.4848
chrIV	1079950	1080899	59.0998
chrVII	993900	994799	58.9402
chrX	617750	618349	58.7907
chrXII	340850	341749	58.7851
chrVII	371100	371749	58.7017
chrX	294200	294949	58.6734
chrIV	134300	135049	58.6202
chrXV	231450	232399	58.284
chrV	84850	85499	58.2753
chrXV	836750	837699	58.0121
chrXII	292150	292499	57.9078
chrXIII	407450	408449	57.6725
chrXII	390550	391149	57.5098
chrVI	183200	184049	57.4225
chrXV	825350	826199	57.3492
chrXVI	75100	75499	56.9705
chrXI	308500	309149	56.9477
chrXVI	775150	775649	56.8955
chrIV	955050	955749	56.8902
chrXVI	491450	491899	56.7823
chrV	303300	303949	56.5186
chrV	461600	462199	56.3323
chrIV	1506850	1507799	56.2828
chrXIV	440700	441449	56.1695
chrIV	465000	465599	56.1455
chrXII	796950	797599	55.7088
chrV	122950	123449	55.471
chrVIII	98400	99049	55.4449
chrXVI	789450	789949	55.169
chrV	194850	195599	55.1575

## Sheet: Sheet2
Table S5: Cse4 Peaks observed in wild type and hir2∆ strains overexpressing Cse4. The chromosomal location and SICER score of Cse4 peaks found in hir2∆ strain from the ChIP-seq experiment.
chromosome	start	end	SICER score
chrV	5600	6199	41.0872
chrV	9700	10149	34.2541
chrV	12650	13399	77.0736
chrV	15800	16349	41.1347
chrV	26350	27899	125.359
chrV	42450	43099	74.9718
chrV	45700	46349	47.0788
chrV	51450	52099	69.3623
chrV	66550	66999	68.6249
chrV	69350	70299	105.62
chrV	70450	70999	37.0548
chrV	86350	87399	92.0739
chrV	105850	106299	43.9581
chrV	121300	121749	33.3518
chrV	123050	123449	55.4204
chrV	141700	142399	39.9464
chrV	144150	144499	51.7298
chrV	151200	151649	44.4919
chrV	151750	151949	38.388
chrV	152050	153999	257.224
chrV	174400	175099	59.1671
chrV	177300	177699	38.9971
chrV	182400	183099	59.9078
chrV	188000	188449	42.3227
chrV	194450	195499	97.9877
chrV	198750	199249	40.0522
chrV	210000	210549	87.9355
chrV	211250	211949	85.3398
chrV	241950	243549	205.022
chrV	246600	247099	33.7378
chrV	247900	248599	103.71
chrV	258150	258549	44.8096
chrV	259900	260199	36.2568
chrV	260300	260799	70.0603
chrV	261250	262199	131.127
chrV	264400	264649	37.1488
chrV	268600	269299	83.7132
chrV	281200	281449	35.9017
chrV	284950	285299	34.7732
chrV	287050	287749	54.6927
chrV	294900	295199	38.0058
chrV	298200	298499	57.2143
chrV	303050	304199	106.411
chrV	307350	307749	49.5343
chrV	310900	311999	182.759
chrV	319850	320099	34.5909
chrV	334550	336299	201.63
chrV	342650	343249	41.0113
chrV	347750	348549	49.8008
chrV	354950	355749	118.177
chrV	366700	367149	59.1774
chrV	377450	378699	171.352
chrV	402200	402549	41.4504
chrV	409150	409499	34.1173
chrV	422500	423249	113.333
chrV	430600	431149	92.4868
chrV	438800	439699	108.724
chrV	459850	460449	61.8043
chrV	461150	462849	198.748
chrV	463050	463699	74.3406
chrV	467250	467949	60.8949
chrV	482500	483549	135.267
chrV	484000	484949	96.1921
chrV	488350	488649	44.5289
chrV	490300	491049	123.244
chrV	502350	502999	56.4438
chrV	544300	545349	151.499
chrV	550850	551299	54.8819
chrV	558850	559799	100.349
chrV	560400	561199	45.0735
chrV	565100	565549	39.4876
chrV	567550	568199	67.2002
chrV	570100	570599	33.8975
chrV	570700	571049	43.5285
chrV	573500	574099	55.6455
chrV	576300	576749	36.493
chrII	5200	5499	36.6254
chrII	10450	10899	36.7288
chrII	27800	29599	195.869
chrII	39000	39549	70.3254
chrII	49500	49749	36.9111
chrII	63450	64049	55.6679
chrII	71000	71499	45.2616
chrII	91900	92449	35.6264
chrII	101500	102299	88.2689
chrII	116550	117249	54.9717
chrII	136100	136599	47.8095
chrII	137700	138049	62.3129
chrII	140750	141049	61.9936
chrII	161550	162199	80.0987
chrII	165350	165899	108.446
chrII	169850	170199	36.0444
chrII	191600	192149	55.98
chrII	193800	194249	51.6415
chrII	196000	196349	33.9095
chrII	202250	203249	81.2418
chrII	206550	207049	38.3375
chrII	209700	210049	38.8421
chrII	216550	217049	34.3489
chrII	237200	238199	120.137
chrII	238300	238699	76.4286
chrII	246600	247099	55.4647
chrII	251150	251949	155.29
chrII	254250	254949	82.0409
chrII	269150	269599	36.183
chrII	269700	270299	81.4291
chrII	273850	274149	60.6943
chrII	275650	276199	99.5863
chrII	280700	281599	106.883
chrII	287950	288699	85.1577
chrII	301400	302099	70.0047
chrII	307400	307949	39.6442
chrII	311150	311499	52.0542
chrII	338000	339149	124.034
chrII	341000	342699	238.916
chrII	350850	351349	60.7028
chrII	353050	353499	45.3573
chrII	360000	360399	48.6379
chrII	370450	371649	176.28
chrII	371750	372449	63.1642
chrII	373300	373649	59.2663
chrII	378800	379599	69.7835
chrII	379850	380699	58.831
chrII	381250	381849	44.1481
chrII	382650	383499	108.577
chrII	386050	386599	41.6477
chrII	405900	406399	76.7059
chrII	408150	409199	156.749
chrII	410650	411149	68.316
chrII	418000	418549	62.4313
chrII	419250	420099	201.732
chrII	423200	423949	72.3165
chrII	426450	426899	56.7793
chrII	431000	432149	194.1
chrII	441300	441849	89.0182
chrII	466100	466749	108.481
chrII	479200	479699	65.0765
chrII	480750	481249	86.6794
chrII	486450	486899	60.643
chrII	488250	488799	58.3075
chrII	493800	494149	52.1023
chrII	503600	504449	71.7058
chrII	505600	506149	42.0141
chrII	533200	533949	56.1844
chrII	537300	538049	49.9456
chrII	544250	544549	38.5216
chrII	546150	546749	47.8149
chrII	549600	550299	79.7484
chrII	553950	554649	35.8933
chrII	554950	555699	59.8384
chrII	558350	558899	63.8451
chrII	561350	561899	44.7719
chrII	585850	586399	54.4742
chrII	591000	591399	38.1517
chrII	599850	600349	34.6379
chrII	614400	615149	49.6458
chrII	623000	623649	67.2342
chrII	634900	635399	37.987
chrII	642400	643049	150.075
chrII	650150	650499	45.559
chrII	661850	662449	51.379
chrII	664500	664749	38.9557
chrII	666100	666749	68.8408
chrII	670000	670699	42.5753
chrII	678800	679299	37.929
chrII	679900	680649	171.661
chrII	701650	702599	153.396
chrII	703700	704299	59.3891
chrII	706850	707549	68.0025
chrII	718150	718549	35.4318
chrII	718800	719299	36.3564
chrII	722550	723099	35.9808
chrII	734050	734749	82.86
chrII	741100	741649	58.4493
chrII	756950	757599	55.2359
chrII	760250	760849	46.1418
chrII	791950	792249	33.9274
chrII	799050	800299	135.83
chrII	811300	811899	59.6464
chrVI	10950	11499	34.3526
chrVI	12350	12849	57.4573
chrVI	32550	32899	33.8024
chrVI	45200	45599	33.5923
chrVI	74000	74699	106.85
chrVI	76600	77099	60.9017
chrVI	82050	82349	33.4174
chrVI	87000	87349	36.132
chrVI	95250	95649	71.1962
chrVI	97800	98349	54.6575
chrVI	103450	103849	34.4717
chrVI	104000	104499	67.303
chrVI	111650	112149	40.9427
chrVI	115350	116099	43.2
chrVI	131450	131949	69.8245
chrVI	135400	136049	65.8256
chrVI	137000	137399	42.8882
chrVI	147050	147299	39.6549
chrVI	148650	149449	88.2585
chrVI	153000	153399	36.5551
chrVI	155750	156199	40.9225
chrVI	160200	160749	66.0708
chrVI	162350	162799	58.082
chrVI	169150	169749	55.5107
chrVI	183400	183999	54.749
chrVI	191500	191849	37.9567
chrVI	193900	194749	60.4944
chrVI	196500	196949	45.7216
chrVI	204550	204799	39.1954
chrVI	219800	220349	55.6946
chrVI	226200	226699	63.4008
chrVI	229250	229699	34.4
chrVI	244800	245349	46.0118
chrVI	246100	246549	40.1343
chrVI	255750	256899	155.18
chrVI	260950	261499	38.1383
chrVI	263100	263799	69.718
chrIV	19050	19499	40.5042
chrIV	46050	46449	36.8249
chrIV	47600	48149	61.4921
chrIV	49100	50149	118.082
chrIV	62350	62849	69.5959
chrIV	69800	70499	79.8455
chrIV	74150	74649	38.1292
chrIV	80300	80749	36.5956
chrIV	83550	84149	90.1873
chrIV	88100	88449	50.1372
chrIV	90000	90549	45.8642
chrIV	103000	103499	69.4274
chrIV	104300	104799	53.0321
chrIV	111350	111749	39.1286
chrIV	137750	138199	66.6124
chrIV	147700	148199	54.262
chrIV	166900	167549	85.6472
chrIV	169300	169699	34.6949
chrIV	174300	175149	66.4187
chrIV	211900	212249	42.4953
chrIV	212700	213649	83.2974
chrIV	221100	221449	38.5455
chrIV	226950	227749	100.669
chrIV	230650	231199	59.3256
chrIV	234100	235099	143.821
chrIV	255100	255449	36.0024
chrIV	263850	264349	45.4775
chrIV	281550	281949	33.9389
chrIV	284900	285249	43.445
chrIV	302400	303049	81.1672
chrIV	312000	312499	44.5721
chrIV	314700	315199	84.8492
chrIV	316200	316849	65.9509
chrIV	344800	345999	110.679
chrIV	351300	351649	42.1799
chrIV	356600	357849	162.08
chrIV	358000	359149	71.9876
chrIV	361050	361449	53.8777
chrIV	365250	366899	204.05
chrIV	367850	368849	86.8109
chrIV	378050	378849	106.563
chrIV	381400	381849	35.036
chrIV	386250	387349	75.3792
chrIV	388550	388899	33.5923
chrIV	407450	407999	66.5651
chrIV	410450	411399	129.264
chrIV	413250	413599	35.6052
chrIV	421650	422249	54.4003
chrIV	443800	443999	44.644
chrIV	447200	448399	124.507
chrIV	449450	450099	248.582
chrIV	455100	455599	43.6984
chrIV	458150	458399	34.1141
chrIV	462600	463149	43.2728
chrIV	473100	473399	34.1666
chrIV	493900	494499	43.8377
chrIV	504700	505149	37.4468
chrIV	505350	506699	166.759
chrIV	506850	507799	65.3041
chrIV	521100	521449	40.9317
chrIV	524550	525199	59.125
chrIV	539250	539949	103.277
chrIV	541250	541549	37.5181
chrIV	542100	542549	83.7656
chrIV	543300	544149	62.6245
chrIV	544250	544699	69.8038
chrIV	545600	546249	82.824
chrIV	550250	552249	229.482
chrIV	555350	555649	40.3575
chrIV	557800	558199	50.2407
chrIV	560350	560899	37.3399
chrIV	562250	563799	156.061
chrIV	565400	566249	41.5014
chrIV	573900	574449	45.9451
chrIV	591750	592799	193.582
chrIV	593250	593499	37.5133
chrIV	596850	597149	39.3853
chrIV	603600	603899	33.4757
chrIV	616300	616749	59.0218
chrIV	635450	636049	52.3329
chrIV	636350	637049	96.6339
chrIV	654750	655149	56.4305
chrIV	657650	658699	72.6544
chrIV	666600	667199	52.0386
chrIV	679800	680599	60.398
chrIV	681250	682399	168.209
chrIV	683500	683849	33.8118
chrIV	690650	691149	60.6428
chrIV	720300	720799	52.1255
chrIV	722000	722649	46.5628
chrIV	769800	770149	39.3997
chrIV	770350	770749	37.5603
chrIV	771700	771949	34.2611
chrIV	775900	776349	42.2968
chrIV	784150	784649	57.5823
chrIV	784750	785199	40.0776
chrIV	820950	821499	66.4633
chrIV	827450	827949	41.3552
chrIV	835400	835899	49.9632
chrIV	838300	838749	59.9815
chrIV	866950	867549	63.3017
chrIV	887100	887399	38.3511
chrIV	889050	889649	80.193
chrIV	894050	894749	77.3943
chrIV	903300	903749	51.7928
chrIV	904850	905099	36.1065
chrIV	909150	909499	52.9443
chrIV	913900	914199	34.6356
chrIV	916100	916749	146.678
chrIV	931100	931699	51.7956
chrIV	933350	933749	51.2985
chrIV	943000	943499	61.6247
chrIV	946650	947149	34.8951
chrIV	954100	954499	48.6324
chrIV	955400	955799	39.6763
chrIV	959550	960299	53.5464
chrIV	963350	963799	42.4002
chrIV	971000	971599	45.665
chrIV	975650	976249	57.4804
chrIV	976800	977299	65.2063
chrIV	980300	980999	72.1522
chrIV	1010900	1011549	71.2522
chrIV	1013450	1014049	43.2185
chrIV	1016300	1016849	54.9508
chrIV	1022400	1022949	61.1922
chrIV	1036950	1037249	36.9752
chrIV	1055750	1056249	70.8677
chrIV	1056350	1056749	34.0706
chrIV	1067500	1067949	86.9669
chrIV	1080250	1080649	60.5514
chrIV	1107800	1108199	50.0893
chrIV	1129550	1129949	36.939
chrIV	1146050	1146649	64.8534
chrIV	1149550	1149799	35.4033
chrIV	1153300	1154049	169.885
chrIV	1156650	1156999	44.5711
chrIV	1161950	1162799	104.337
chrIV	1166200	1166899	87.1308
chrIV	1184450	1184849	41.6541
chrIV	1186050	1186349	34.1381
chrIV	1188900	1189849	130.963
chrIV	1203850	1204299	35.3335
chrIV	1213700	1214099	39.3286
chrIV	1217100	1217649	39.2826
chrIV	1240250	1240899	82.775
chrIV	1242150	1242649	45.9892
chrIV	1251850	1252399	46.0948
chrIV	1256600	1256899	49.2696
chrIV	1258450	1258949	51.1273
chrIV	1263000	1263399	54.9514
chrIV	1269300	1269699	37.6992
chrIV	1278600	1280349	229.509
chrIV	1305800	1306299	48.1108
chrIV	1319750	1320349	34.2325
chrIV	1333700	1334799	81.809
chrIV	1341750	1342749	99.4848
chrIV	1358950	1359549	47.0287
chrIV	1367000	1367649	41.473
chrIV	1383200	1383949	76.0866
chrIV	1409750	1410849	79.6875
chrIV	1414500	1414949	40.7382
chrIV	1433950	1434349	40.3183
chrIV	1434550	1435049	38.5949
chrIV	1447600	1448099	62.3427
chrIV	1461300	1461699	62.6171
chrIV	1465550	1466249	76.1633
chrIV	1470600	1470949	37.8317
chrIV	1476600	1477499	84.2467
chrIV	1488650	1489199	97.9751
chrIV	1491050	1491449	47.8226
chrIV	1502350	1502999	57.5662
chrIV	1506700	1507449	92.5515
chrIV	1507550	1507899	44.5619
chrIV	1517850	1518299	54.6951
chrXIV	0	649	49.1387
chrXIV	2800	3499	48.4765
chrXIV	3600	4099	34.6972
chrXIV	13100	13649	45.9102
chrXIV	14450	14749	49.9154
chrXIV	40500	41049	47.7683
chrXIV	52250	52799	71.9281
chrXIV	59850	60349	51
chrXIV	64800	65649	66.757
chrXIV	68500	68949	36.1061
chrXIV	80100	80999	67.1293
chrXIV	87200	87899	106.024
chrXIV	89350	89999	90.7467
chrXIV	107350	107999	50.1073
chrXIV	113200	113649	35.1747
chrXIV	116250	117249	120.262
chrXIV	118950	119449	55.4356
chrXIV	122450	123199	78.8502
chrXIV	137100	138399	184.724
chrXIV	172100	172349	35.5389
chrXIV	175250	175799	46.0036
chrXIV	185200	185699	68.4334
chrXIV	197450	198099	53.8457
chrXIV	198200	199549	142.121
chrXIV	206750	207149	42.7464
chrXIV	224200	224649	40.8383
chrXIV	228950	229299	33.6421
chrXIV	241550	242049	40.2373
chrXIV	257950	258249	35.318
chrXIV	259650	260449	48.6486
chrXIV	273850	274549	56.5399
chrXIV	275950	276549	47.2351
chrXIV	280050	280699	74.1403
chrXIV	301800	302399	106.056
chrXIV	306750	307249	45.7514
chrXIV	310150	310749	37.5096
chrXIV	326150	326599	48.0525
chrXIV	335250	335749	49.473
chrXIV	348950	349299	40.3437
chrXIV	350150	350949	104.664
chrXIV	354650	355549	98.6952
chrXIV	355750	356149	58.2255
chrXIV	373500	374099	44.2895
chrXIV	374500	374899	36.9406
chrXIV	391950	392699	52.7244
chrXIV	426350	426949	39.1901
chrXIV	427050	427499	40.0034
chrXIV	437300	437899	46.8649
chrXIV	440700	441449	87.951
chrXIV	441750	442899	99.3764
chrXIV	457300	457899	56.1361
chrXIV	462200	462549	34.0048
chrXIV	497900	498999	180.195
chrXIV	500550	500999	69.395
chrXIV	501100	501999	50.8473
chrXIV	516950	517649	59.318
chrXIV	525150	525849	81.9874
chrXIV	541850	542499	39.7131
chrXIV	547150	547699	78.1349
chrXIV	573900	574549	61.462
chrXIV	577250	577799	39.7803
chrXIV	578300	579699	146.708
chrXIV	592700	593149	39.2049
chrXIV	602400	603099	45.751
chrXIV	604800	605399	117.825
chrXIV	606300	607099	67.6349
chrXIV	614450	615099	46.2596
chrXIV	625700	626249	54.8587
chrXIV	628700	629499	171.082
chrXIV	631100	632049	148.202
chrXIV	632650	632999	41.2903
chrXIV	633550	634749	135.945
chrXIV	636750	637149	39.6021
chrXIV	642550	643249	93.3326
chrXIV	643650	644099	66.3817
chrXIV	651450	651799	52.5625
chrXIV	653000	654499	142.517
chrXIV	661750	662549	125.08
chrXIV	663800	663999	34.8145
chrXIV	664150	664699	60.0621
chrXIV	665050	665649	58.2521
chrXIV	685600	686349	62.8016
chrXIV	690300	690749	37.6828
chrXIV	691600	692249	74.9108
chrXIV	701300	701749	33.4667
chrXIV	711600	711899	49.5649
chrXIV	718750	719249	36.6085
chrXIV	733350	733849	44.8085
chrXIV	735900	736299	38.9358
chrXIV	738850	739399	75.8351
chrXIV	739800	740149	43.8504
chrXIV	749800	750399	40.3662
chrXIV	759300	759749	80.3494
chrXVI	5850	6499	72.416
chrXVI	14150	14699	47.4608
chrXVI	24600	25149	60.8623
chrXVI	25850	26499	124.378
chrXVI	46650	47249	59.4528
chrXVI	66500	67449	113.102
chrXVI	67550	67949	39.4291
chrXVI	72750	73149	53.5624
chrXVI	73500	74049	67.9655
chrXVI	75050	75499	65.5619
chrXVI	82050	82549	43.8215
chrXVI	95800	96499	114.034
chrXVI	105200	105749	35.6559
chrXVI	105850	106449	58.3552
chrXVI	107050	107649	59.8716
chrXVI	116650	117249	59.9945
chrXVI	120900	121349	53.0147
chrXVI	132500	132849	57.6932
chrXVI	136550	136999	44.1298
chrXVI	157500	158199	85.9824
chrXVI	165950	166499	55.9437
chrXVI	169050	169649	58.157
chrXVI	183100	183449	38.6407
chrXVI	184550	184899	54.1546
chrXVI	191050	191699	52.1095
chrXVI	193450	194199	65.9293
chrXVI	195350	195949	48.7323
chrXVI	198750	199199	35.3152
chrXVI	202300	202849	55.5295
chrXVI	214250	214549	52.0415
chrXVI	214650	215349	107.53
chrXVI	215500	215949	38.4605
chrXVI	227450	227999	141.105
chrXVI	237050	237449	35.5957
chrXVI	241300	241599	43.0925
chrXVI	254100	254649	40.7834
chrXVI	271050	271499	50.1441
chrXVI	279950	280349	36.9752
chrXVI	286500	287049	46.7004
chrXVI	290850	291349	56.0442
chrXVI	296200	296749	35.5274
chrXVI	299250	299799	45.2987
chrXVI	309300	310049	75.5249
chrXVI	338400	338749	33.5822
chrXVI	338900	339849	102.949
chrXVI	361750	362199	50.8868
chrXVI	369050	369799	58.7477
chrXVI	373200	373949	79.0323
chrXVI	382900	383449	41.9861
chrXVI	403800	404699	89.4225
chrXVI	423800	424299	44.1891
chrXVI	427900	428349	42.4218
chrXVI	431350	432049	68.5449
chrXVI	434200	434899	61.5946
chrXVI	445200	445549	42.0349
chrXVI	450700	451449	113.495
chrXVI	464050	464999	115.469
chrXVI	475550	475949	44.7514
chrXVI	478900	479349	44.6015
chrXVI	482500	482799	46.355
chrXVI	486200	486849	55.1841
chrXVI	488050	488449	33.6758
chrXVI	491000	491799	71.072
chrXVI	492800	493699	66.6772
chrXVI	495350	495699	53.2415
chrXVI	502900	503349	114.035
chrXVI	503550	504149	43.21
chrXVI	517100	517849	67.9297
chrXVI	519750	520249	43.9789
chrXVI	525000	525549	60.9032
chrXVI	526100	528099	216.821
chrXVI	538950	539449	37.8341
chrXVI	548250	548799	91.4298
chrXVI	556050	556799	124.267
chrXVI	557700	558649	62.9623
chrXVI	566400	566949	40.7993
chrXVI	568950	569449	41.0569
chrXVI	572250	572549	38.0418
chrXVI	575250	576049	55.3499
chrXVI	586150	587249	97.2447
chrXVI	587450	588849	122.683
chrXVI	619300	620299	68.3932
chrXVI	622000	622549	45.0672
chrXVI	622750	623249	44.3208
chrXVI	631350	631999	60.7326
chrXVI	639450	639749	53.247
chrXVI	641650	642149	38.3316
chrXVI	645150	645649	99.6711
chrXVI	646400	647149	111.74
chrXVI	678450	678849	63.1491
chrXVI	681200	682049	81.3743
chrXVI	689750	690149	37.1111
chrXVI	694950	695599	128.564
chrXVI	718250	718599	42.4909
chrXVI	758400	758849	38.471
chrXVI	767550	767999	46.9881
chrXVI	774100	774399	38.8293
chrXVI	775100	775699	133.373
chrXVI	777300	777649	41.8942
chrXVI	777750	778399	33.5334
chrXVI	789550	790499	112.624
chrXVI	812550	813099	43.7349
chrXVI	821950	823049	162.234
chrXVI	825050	825649	87.2961
chrXVI	826300	826749	44.2045
chrXVI	828400	829149	81.5268
chrXVI	831400	831699	34.2814
chrXVI	832150	832749	49.5907
chrXVI	839800	840599	65.3194
chrXVI	841150	841849	56.47
chrXVI	860500	860999	73.7246
chrXVI	876350	876899	40.3029
chrXVI	900600	900999	42.8214
chrXVI	906850	907249	49.188
chrXVI	920700	921249	165.398
chrXVI	927550	928549	149.762
chrXVI	928900	929199	37.1994
chrXVI	930900	931749	64.852
chrXVI	944350	945149	59.0002
chrXI	20200	21449	114.513
chrXI	21700	21949	39.6828
chrXI	24300	24549	33.6879
chrXI	24650	25099	45.6365
chrXI	67300	68899	218.321
chrXI	69150	69599	54.5691
chrXI	91650	92649	124.689
chrXI	96400	96649	35.1837
chrXI	98750	99649	153.639
chrXI	122350	122699	40.3279
chrXI	127200	127899	86.1976
chrXI	133200	133549	45.2583
chrXI	135600	136149	74.8174
chrXI	143550	144149	47.4
chrXI	146500	146999	45.5151
chrXI	148700	149049	44.2475
chrXI	154500	155149	46.1196
chrXI	163050	163499	59.6366
chrXI	168400	168899	65.7516
chrXI	171350	172099	58.4651
chrXI	191250	191599	71.9253
chrXI	194700	195249	67.6565
chrXI	203050	203749	108.785
chrXI	213650	214199	43.1891
chrXI	216800	217349	36.9809
chrXI	225600	226049	51.8626
chrXI	229900	230199	33.6761
chrXI	230300	231549	272.079
chrXI	234300	234799	109.843
chrXI	237000	237599	38.2658
chrXI	248050	248799	96.2991
chrXI	255050	255549	50.5008
chrXI	257600	259499	219.517
chrXI	259750	259999	56.9659
chrXI	260100	260799	105.881
chrXI	260900	261499	71.4831
chrXI	261750	262199	46.3061
chrXI	264300	265199	78.2028
chrXI	273300	273749	42.7169
chrXI	280500	280849	35.9514
chrXI	291100	291699	48.104
chrXI	296000	296599	53.1334
chrXI	303000	303499	71.5757
chrXI	307000	307549	48.7731
chrXI	308300	309099	102.657
chrXI	315500	315849	34.7533
chrXI	317650	318249	33.7083
chrXI	321850	322349	135.822
chrXI	322700	323449	105.296
chrXI	325650	326249	46.3167
chrXI	335200	335649	35.0488
chrXI	340100	340599	44.3272
chrXI	340750	341149	37.8692
chrXI	352950	353399	36.378
chrXI	354900	356599	166.703
chrXI	358050	358749	63.2062
chrXI	369050	369699	104.732
chrXI	384650	385049	45.7543
chrXI	393650	394049	36.9859
chrXI	428200	429099	135.042
chrXI	430400	430999	53.9119
chrXI	439300	440099	148.665
chrXI	442600	443099	36.6618
chrXI	445000	446099	102.633
chrXI	462950	464299	214.735
chrXI	491100	491599	43.8086
chrXI	517100	517449	37.3652
chrXI	518150	519099	179.355
chrXI	521350	521749	50.5276
chrXI	526850	527199	38.2372
chrXI	527700	528099	36.8319
chrXI	552500	552949	40.9985
chrXI	578900	579499	41.8368
chrXI	581400	581799	34.4717
chrXI	589550	589999	35.0673
chrXI	599300	599949	48.4669
chrXI	608850	609199	44.6356
chrXI	614500	614899	55.5279
chrXI	615150	615649	53.8121
chrXI	625500	626149	59.7758
chrXI	658100	658499	35.7117
chrXIII	200	649	40.2741
chrXIII	3150	3599	42.4292
chrXIII	4700	5499	82.1077
chrXIII	6850	7349	56.4978
chrXIII	13900	14349	42.3553
chrXIII	30050	30349	79.4143
chrXIII	61950	62599	56.604
chrXIII	69500	70449	92.5088
chrXIII	76900	77249	38.0239
chrXIII	79550	80099	39.3676
chrXIII	91200	91949	142.847
chrXIII	108700	109049	48.2985
chrXIII	115100	115549	41.0643
chrXIII	129000	129649	41.7094
chrXIII	140150	140799	85.6166
chrXIII	160050	160649	79.3479
chrXIII	164500	165199	45.4553
chrXIII	181350	181649	35.8557
chrXIII	192100	193049	75.667
chrXIII	217250	217699	55.0973
chrXIII	220850	221399	72.1031
chrXIII	230350	231099	48.5151
chrXIII	252850	253349	54.6422
chrXIII	258350	259199	186.005
chrXIII	267900	268799	237.712
chrXIII	272950	273299	57.1101
chrXIII	273850	274249	37.4033
chrXIII	279750	280299	60.099
chrXIII	282800	283649	86.5608
chrXIII	283750	283999	45.0376
chrXIII	286800	287449	56.9802
chrXIII	290900	291399	46.062
chrXIII	305750	307349	222.887
chrXIII	309000	309799	83.7446
chrXIII	340700	341349	49.1508
chrXIII	343450	344099	47.736
chrXIII	346550	347899	156.382
chrXIII	350450	350799	35.279
chrXIII	352200	353649	177.936
chrXIII	353850	354199	44.404
chrXIII	386650	387249	66.3044
chrXIII	387550	388699	151.206
chrXIII	396300	396849	46.129
chrXIII	396950	397449	40.1235
chrXIII	407700	408349	52.8269
chrXIII	415800	416449	83.7095
chrXIII	420350	420599	39.3831
chrXIII	432250	432949	66.0479
chrXIII	433150	433649	33.6718
chrXIII	433800	434549	87.4879
chrXIII	436100	436499	43.8596
chrXIII	438900	439349	41.8263
chrXIII	455750	456149	40.8649
chrXIII	472000	472749	93.7963
chrXIII	479900	480599	77.9388
chrXIII	481900	482249	35.4208
chrXIII	482400	482899	35.9717
chrXIII	483000	483749	71.5976
chrXIII	508950	509599	43.6216
chrXIII	510600	511049	105.745
chrXIII	511850	512449	51.7767
chrXIII	512550	513299	51.9959
chrXIII	514100	514699	55.0311
chrXIII	531900	532449	46.3973
chrXIII	539750	540249	51.4735
chrXIII	540450	541349	165.761
chrXIII	553150	553699	46.0084
chrXIII	559350	560249	54.1305
chrXIII	572050	572399	33.6761
chrXIII	574700	575449	76.0918
chrXIII	586250	586599	36.154
chrXIII	589250	589849	65.0954
chrXIII	592500	593249	80.8991
chrXIII	599000	599649	59.8375
chrXIII	611400	611699	35.0558
chrXIII	616150	616849	50.396
chrXIII	627650	628249	58.2457
chrXIII	634500	635049	89.3758
chrXIII	646950	647499	58.9867
chrXIII	652500	654399	386.439
chrXIII	661650	662749	136.692
chrXIII	692850	693799	61.5233
chrXIII	696400	697049	64.2937
chrXIII	746050	746599	44.0055
chrXIII	749350	750049	57.7262
chrXIII	750750	751299	47.8193
chrXIII	757150	757499	59.5359
chrXIII	758600	759949	247.249
chrXIII	772950	774499	157.866
chrXIII	775250	775899	56.8577
chrXIII	777100	777699	63.9945
chrXIII	788700	789149	51.3613
chrXIII	793600	793949	37.2651
chrXIII	807600	808099	46.9212
chrXIII	813800	814799	65.8624
chrXIII	820100	820549	41.1332
chrXIII	851850	852199	43.2094
chrXIII	860350	860949	36.2008
chrXIII	869200	869949	71.7988
chrXIII	880800	881249	47.6836
chrXIII	904000	904849	119.576
chrXV	33150	33749	80.6433
chrXV	33900	34499	104.553
chrXV	35450	36299	43.0049
chrXV	40150	40649	34.2013
chrXV	44750	45199	66.7256
chrXV	58350	58649	54.7637
chrXV	83400	84149	90.0615
chrXV	91300	91949	90.8643
chrXV	108650	109749	126.447
chrXV	123600	124249	43.8056
chrXV	126500	126899	56.3822
chrXV	127700	128149	36.7003
chrXV	135600	136149	37.5087
chrXV	154500	154799	35.4476
chrXV	158800	159399	151.498
chrXV	161600	162099	53.152
chrXV	162750	163149	34.1465
chrXV	170300	170549	42.1597
chrXV	218900	219149	34.6251
chrXV	220650	221049	55.6333
chrXV	228400	228949	80.3566
chrXV	230000	230499	40.916
chrXV	233750	234299	54.666
chrXV	246950	247299	48.55
chrXV	271350	271799	42.7679
chrXV	274550	274999	35.1924
chrXV	285850	286399	54.9101
chrXV	288250	289149	143.45
chrXV	296050	296649	44.3512
chrXV	303800	304799	54.9355
chrXV	305100	305749	35.1354
chrXV	312350	312949	84.6565
chrXV	316150	316599	36.9059
chrXV	322650	323299	56.9092
chrXV	324200	325049	90.7405
chrXV	326800	327299	37.3959
chrXV	331050	331599	36.8756
chrXV	333450	334049	47.7245
chrXV	338000	338699	73.7404
chrXV	342300	343299	89.6823
chrXV	347200	347949	46.0785
chrXV	360950	361949	92.2264
chrXV	382950	383249	63.0482
chrXV	385100	385699	70.766
chrXV	386650	387049	39.2027
chrXV	391900	392549	67.584
chrXV	407200	407899	42.9308
chrXV	425750	426449	63.4428
chrXV	429700	430049	39.2433
chrXV	440800	441199	40.4556
chrXV	461400	463249	325.073
chrXV	479400	481149	208.371
chrXV	486850	487399	46.6252
chrXV	487600	488149	56.1611
chrXV	494400	495249	104.398
chrXV	504050	505199	79.5421
chrXV	514450	514899	42.2093
chrXV	520100	520649	68.0356
chrXV	528800	529549	71.5443
chrXV	537200	537649	36.3634
chrXV	546550	546849	40.8848
chrXV	569300	569949	50.1282
chrXV	570750	571249	37.2652
chrXV	572600	573299	49.7926
chrXV	602200	602699	46.0522
chrXV	604700	605249	46.04
chrXV	619000	619299	33.5707
chrXV	624650	625099	38.0091
chrXV	638250	638799	33.4161
chrXV	638950	639349	61.5989
chrXV	661550	661849	42.283
chrXV	667000	667449	48.8758
chrXV	671250	671899	84.005
chrXV	672350	673149	61.9226
chrXV	682650	682999	50.0476
chrXV	685400	686049	81.9788
chrXV	690250	690649	48.2427
chrXV	700800	702049	91.5367
chrXV	721350	721849	45.4232
chrXV	741800	742399	43.7067
chrXV	742600	742999	44.4073
chrXV	745350	746099	59.2294
chrXV	767750	768149	34.0641
chrXV	770000	770599	107.086
chrXV	780800	781199	69.5698
chrXV	781650	782099	48.6776
chrXV	784600	785149	66.1738
chrXV	818350	819049	59.3767
chrXV	820850	821449	40.5042
chrXV	825150	826499	168.07
chrXV	831700	832199	60.9719
chrXV	832650	833249	47.8444
chrXV	836600	837799	119.051
chrXV	842650	843199	60.6943
chrXV	848350	848899	52.4556
chrXV	850100	850449	38.256
chrXV	875200	875849	47.6064
chrXV	880800	881099	47.3079
chrXV	881700	882199	60.4925
chrXV	892150	892599	52.6288
chrXV	903000	904049	94.8254
chrXV	904200	904649	48.8712
chrXV	907650	908299	90.5963
chrXV	908450	908949	92.4153
chrXV	909100	909599	40.8409
chrXV	911700	912249	60.5974
chrXV	922600	922899	34.3314
chrXV	930950	931299	39.4444
chrXV	931750	932299	53.9623
chrXV	954250	954699	42.3723
chrXV	968450	969199	72.7955
chrXV	979000	979849	146.902
chrXV	986050	986649	44.6967
chrXV	996700	997299	75.4921
chrXV	1003400	1003749	39.0348
chrXV	1007050	1007649	82.9827
chrXV	1010200	1010499	35.7052
chrXV	1019300	1019599	38.3657
chrXV	1043900	1044749	100.592
chrXV	1053750	1054399	83.2774
chrXV	1058150	1059199	104.613
chrXV	1059300	1060099	66.1267
chrXV	1073300	1073999	54.3713
chrXV	1074100	1074549	40.1538
chrXV	1076400	1076999	42.294
chrIX	3550	4249	55.5225
chrIX	21400	21849	38.5249
chrIX	32750	33399	74.465
chrIX	36200	36699	45.3774
chrIX	41700	42199	75.9215
chrIX	54050	55499	125.623
chrIX	56500	56949	63.3386
chrIX	62450	62899	47.9393
chrIX	73550	73899	47.4754
chrIX	85050	85599	53.792
chrIX	88450	88799	40.0453
chrIX	92950	93649	37.6891
chrIX	97300	97849	61.0875
chrIX	117900	118249	41.5867
chrIX	126950	127349	62.0951
chrIX	138850	139449	70.5848
chrIX	149850	150399	38.2841
chrIX	159800	160449	52.6127
chrIX	176950	177399	49.3877
chrIX	197600	197849	36.0349
chrIX	203000	203349	34.1396
chrIX	216500	216849	38.1
chrIX	230900	231399	37.9203
chrIX	241450	242449	94.9307
chrIX	247250	247849	53.7707
chrIX	248350	248749	38.3124
chrIX	248950	249749	105.477
chrIX	268450	268949	38.2101
chrIX	291500	292349	117.513
chrIX	301250	301899	50.8718
chrIX	304050	304399	46.259
chrIX	311000	311399	36.0204
chrIX	320750	321499	77.9139
chrIX	333000	333749	54.5002
chrIX	336000	336349	37.5603
chrIX	337450	338449	72.1599
chrIX	345300	345999	101.601
chrIX	348450	348899	35.1006
chrIX	355200	355599	57.749
chrIX	356500	357299	94.2289
chrIX	379950	380349	33.7534
chrIX	383500	385099	171.969
chrIX	385900	386649	73.5079
chrIX	387450	388249	70.9948
chrIX	388400	389099	108.785
chrIX	396700	397449	52.0039
chrIX	398300	398849	36.5772
chrIX	405500	406099	53.0384
chrIX	407850	408399	57.6143
chrIX	414300	414799	36.5015
chrIX	415450	415799	33.8484
chrIX	422050	423299	119.94
chrIX	438050	438399	33.5837
chrIII	24400	25099	48.7068
chrIII	28950	29399	36.0977
chrIII	30400	30849	47.2448
chrIII	39000	39449	49.3121
chrIII	40850	41249	36.26
chrIII	52650	53249	67.1329
chrIII	73500	74349	67.5561
chrIII	77600	78349	43.2816
chrIII	79100	79549	43.0735
chrIII	106400	106999	44.443
chrIII	111600	111949	35.7098
chrIII	114200	114449	44.3156
chrIII	122350	123849	297.54
chrIII	131300	131849	71.5177
chrIII	133250	133599	41.1031
chrIII	141950	142299	51.4388
chrIII	143300	143799	35.4616
chrIII	157450	158299	89.8344
chrIII	161900	162349	42.8716
chrIII	163800	164199	33.9989
chrIII	173250	173649	46.9583
chrIII	190400	190849	61.1425
chrIII	196900	197449	83.5224
chrIII	206450	206749	40.3074
chrIII	210000	210549	54.0746
chrIII	211650	212399	54.8254
chrIII	214750	215799	124.826
chrIII	224950	225349	50.1644
chrIII	228050	228549	55.7231
chrIII	246950	247299	49.9102
chrIII	248550	249199	45.6954
chrIII	254300	254599	43.0819
chrIII	262000	262649	66.1615
chrIII	262850	263899	151.252
chrIII	264700	265349	40.5783
chrIII	295550	295949	41.8519
chrIII	298850	299499	78.3401
chrXII	150	449	34.5317
chrXII	3400	3699	42.6591
chrXII	4950	5599	71.069
chrXII	5850	6299	38.6814
chrXII	10450	11099	66.8852
chrXII	28300	29999	114.42
chrXII	36350	36949	44.9227
chrXII	39300	39599	34.3182
chrXII	52250	52649	49.255
chrXII	65550	66299	48.5794
chrXII	83850	84249	69.0878
chrXII	91550	92099	94.052
chrXII	92600	93549	66.9486
chrXII	94700	95199	74.6416
chrXII	99950	100399	41.9476
chrXII	108650	109749	178.709
chrXII	150350	150849	108.884
chrXII	155950	156699	80.1432
chrXII	187650	188199	79.9724
chrXII	201550	201849	38.5733
chrXII	222050	222499	41.3758
chrXII	228350	229199	94.9541
chrXII	230300	231249	100.073
chrXII	231700	232699	87.0775
chrXII	234800	235249	38.1011
chrXII	245200	245899	54.0034
chrXII	255100	255849	69.4448
chrXII	266500	267399	56.6446
chrXII	270600	270999	54.1344
chrXII	281300	281749	37.3049
chrXII	283750	284349	56.5011
chrXII	292200	292849	95.0101
chrXII	293550	293949	38.915
chrXII	296050	296449	34.6551
chrXII	320050	320999	114.446
chrXII	322850	323299	35.401
chrXII	332300	332849	40.6721
chrXII	337100	337499	47.6221
chrXII	340800	341799	111.569
chrXII	342900	343899	74.8291
chrXII	347800	348349	53.8621
chrXII	368900	369549	64.8621
chrXII	370900	371349	73.2281
chrXII	377550	378149	70.1455
chrXII	388300	389549	107.054
chrXII	390300	390999	66.281
chrXII	395300	395699	37.4204
chrXII	413100	413749	45.8079
chrXII	416250	417999	161.051
chrXII	423100	423549	49.8773
chrXII	427200	427649	45.431
chrXII	444800	445349	64.2448
chrXII	447100	448649	187.196
chrXII	449250	449899	68.4188
chrXII	490700	491199	46.6311
chrXII	506050	506349	34.4949
chrXII	510100	510949	142.794
chrXII	517900	518299	42.4426
chrXII	524400	525099	69.2668
chrXII	528100	528449	36.7412
chrXII	537200	537499	43.6483
chrXII	553200	554249	88.1781
chrXII	556600	556999	38.1351
chrXII	561350	561999	37.7691
chrXII	566600	567699	87.6529
chrXII	571300	571999	94.9193
chrXII	592100	592649	43.4177
chrXII	593950	594499	33.5738
chrXII	603150	604149	174.296
chrXII	605000	605449	50.6715
chrXII	606650	607899	176.886
chrXII	609400	610249	116.617
chrXII	611300	611849	70.2754
chrXII	623600	624399	54.418
chrXII	627050	627449	34.3129
chrXII	633150	633799	36.8556
chrXII	642500	642899	37.1039
chrXII	645300	645849	100.587
chrXII	658000	658549	49.1801
chrXII	659850	660799	137.211
chrXII	675200	675599	42.578
chrXII	677750	678199	40.1886
chrXII	686800	687399	46.6531
chrXII	703900	704449	69.1351
chrXII	711850	712299	38.1166
chrXII	717700	717999	40.2115
chrXII	722650	723999	165.128
chrXII	727600	728099	53.582
chrXII	730600	731149	51.9728
chrXII	743600	744449	48.3061
chrXII	745350	746249	72.0679
chrXII	747300	747699	46.7187
chrXII	759400	759799	41.2324
chrXII	763800	764249	41.0253
chrXII	764400	765349	138.912
chrXII	771750	772249	46.8919
chrXII	781650	782499	105.89
chrXII	782600	782949	68.0033
chrXII	783900	784399	96.9665
chrXII	784500	785049	85.707
chrXII	790150	790449	34.6176
chrXII	796600	797049	33.3249
chrXII	797150	797599	49.8169
chrXII	808600	809449	96.0613
chrXII	818650	818949	65.07
chrXII	820250	820699	68.4555
chrXII	822750	823099	52.9586
chrXII	827400	828749	164.11
chrXII	830200	830799	40.321
chrXII	833450	834149	55.5236
chrXII	837100	837799	99.6088
chrXII	839550	840149	64.6067
chrXII	855150	855549	33.4865
chrXII	857350	857699	35.1934
chrXII	867050	867549	47.244
chrXII	870750	871399	49.7382
chrXII	874900	875249	40.903
chrXII	877300	878699	159.967
chrXII	893050	893799	83.4903
chrXII	902100	902699	45.8279
chrXII	932300	932599	40.4794
chrXII	947200	947599	41.7993
chrXII	949350	950199	56.1678
chrXII	954300	955249	100.683
chrXII	988200	988849	56.8634
chrXII	1001350	1001999	49.0977
chrXII	1011000	1011399	67.7925
chrXII	1011600	1012049	53.7324
chrXII	1022100	1022699	46.2914
chrXII	1035750	1036349	63.7244
chrXII	1043100	1043699	55.9305
chrXII	1054950	1055349	42.5183
chrXII	1068200	1068699	44.5233
chrXII	1074450	1075199	78.1123
chrX	3500	4349	48.2416
chrX	18700	18949	39.5937
chrX	22700	23199	44.464
chrX	30900	31999	73.6793
chrX	36650	36999	39.7308
chrX	37750	38499	63.1072
chrX	54300	54699	48.8994
chrX	85150	85999	88.6272
chrX	89550	90149	38.6579
chrX	96350	96849	57.1684
chrX	101050	101599	39.1236
chrX	109250	109899	50.2785
chrX	118900	119599	54.6971
chrX	119700	120199	56.8796
chrX	135800	136299	75.5889
chrX	137000	137299	34.0255
chrX	146700	147599	87.0696
chrX	157850	158299	39.9153
chrX	159550	160149	50.6523
chrX	164850	165599	59.3009
chrX	177400	177849	48.1702
chrX	180100	180799	57.5986
chrX	186300	186749	37.8341
chrX	190750	191699	91.8251
chrX	195800	196249	47.9321
chrX	204550	205399	67.8533
chrX	219650	220199	48.304
chrX	220550	220899	58.28
chrX	236250	237499	127.467
chrX	254250	254649	38.2981
chrX	278350	279199	93.494
chrX	284950	285349	74.4794
chrX	289300	289749	46.5462
chrX	294600	294949	36.7508
chrX	295150	295499	34.9924
chrX	302600	303349	57.9926
chrX	315050	315549	53.5652
chrX	316600	316999	43.8666
chrX	317200	317799	40.6233
chrX	334200	334549	35.1782
chrX	337200	338099	147.261
chrX	348750	349049	59.1765
chrX	355400	355949	95.1052
chrX	360200	360949	100.539
chrX	361100	361599	48.1432
chrX	374000	375249	122.724
chrX	383700	384149	36.7575
chrX	390650	390999	33.4949
chrX	391100	392249	229.86
chrX	393900	394149	42.1435
chrX	404950	405399	36.8539
chrX	407450	407849	41.8733
chrX	413350	414099	86.9268
chrX	419250	419749	50.0301
chrX	424250	424399	35.5968
chrX	425000	425449	43.8585
chrX	436500	437299	107.607
chrX	448300	448949	45.6952
chrX	454750	455049	39.3863
chrX	465450	466299	63.0171
chrX	485950	486349	49.9516
chrX	507250	508149	73.1015
chrX	518900	519449	42.1558
chrX	533600	534399	49.3833
chrX	540200	540899	65.1957
chrX	548400	549149	69.0146
chrX	550150	550999	49.3085
chrX	567200	567899	50.0117
chrX	571650	572149	38.2662
chrX	576450	576949	54.5784
chrX	578150	578799	86.0365
chrX	578900	579299	46.8753
chrX	579450	579949	49.8119
chrX	606050	607449	127.579
chrX	609050	609549	66.1472
chrX	613050	613549	46.2169
chrX	618050	618399	55.1392
chrX	636500	636899	35.2511
chrX	638750	639099	58.1593
chrX	639250	639599	61.358
chrX	639950	640749	64.536
chrX	640850	641399	60.7036
chrX	654150	654599	34.1295
chrX	662500	662849	35.4502
chrX	662950	663499	45.6656
chrX	664100	664699	55.7873
chrX	703450	703999	56.1011
chrX	717350	718199	61.3296
chrX	725350	725999	52.3556
chrX	743950	744349	33.499
chrVII	10200	10749	36.0184
chrVII	22100	22499	36.154
chrVII	55550	56049	44.3561
chrVII	59050	59399	50.4796
chrVII	69450	70099	56.519
chrVII	73100	73649	40.495
chrVII	84550	84899	36.0921
chrVII	93700	94149	41.1476
chrVII	94650	95199	47.7888
chrVII	108000	108499	40.2673
chrVII	122250	122549	43.6949
chrVII	124300	124749	44.8578
chrVII	153850	154499	45.1697
chrVII	157200	157749	43.6617
chrVII	159050	159399	39.9698
chrVII	165350	166199	147.768
chrVII	166300	167049	83.2806
chrVII	174050	174849	72.9919
chrVII	190900	191299	34.4465
chrVII	193050	193449	40.033
chrVII	196200	196549	33.6102
chrVII	196700	198249	166.552
chrVII	205550	206299	80.598
chrVII	225350	226449	110.824
chrVII	229250	229749	54.3582
chrVII	255550	256049	44.9747
chrVII	269850	270199	35.6095
chrVII	271500	272099	86.9628
chrVII	272400	272899	36.7043
chrVII	286750	287949	107.381
chrVII	288100	288499	38.1321
chrVII	293100	293699	47.4368
chrVII	314350	315099	59.2691
chrVII	319950	320349	58.7147
chrVII	323400	324649	122.385
chrVII	352050	352599	36.1135
chrVII	352850	353199	40.5974
chrVII	355550	356049	34.3541
chrVII	357150	357549	54.3964
chrVII	383350	385399	257.373
chrVII	395450	395899	43.8098
chrVII	398050	398499	46.0208
chrVII	405500	405999	41.8288
chrVII	412700	413899	127.949
chrVII	420850	421649	86.8633
chrVII	423300	423849	37.0267
chrVII	426350	427149	87.0181
chrVII	433450	434999	143.644
chrVII	439800	440349	53.6883
chrVII	442900	443749	102.354
chrVII	472150	472599	81.0828
chrVII	478700	479349	94.3713
chrVII	483550	484899	244.469
chrVII	485000	485649	72.4348
chrVII	490300	490649	34.0277
chrVII	491650	492249	64.764
chrVII	496300	496849	63.0769
chrVII	502600	503049	71.1085
chrVII	508450	508849	42.6272
chrVII	524750	525149	53.713
chrVII	527350	528149	54.7183
chrVII	528250	529349	137.68
chrVII	544050	544649	49.1998
chrVII	546900	547399	45.3021
chrVII	548000	548399	35.7498
chrVII	554550	555299	53.9008
chrVII	559200	559599	35.1747
chrVII	574800	575449	79.1183
chrVII	576500	577149	48.0458
chrVII	583650	584649	134.662
chrVII	592050	592549	115.853
chrVII	592650	593299	42.0758
chrVII	595600	596099	58.05
chrVII	605750	606499	44.4219
chrVII	609800	610449	126.059
chrVII	616950	617349	49.9733
chrVII	620150	620649	64.9431
chrVII	624550	625299	111.188
chrVII	625550	626349	99.0699
chrVII	643500	643949	35.9717
chrVII	651050	652349	129.659
chrVII	652500	652949	39.3591
chrVII	653950	654649	59.007
chrVII	676950	677649	70.8039
chrVII	677850	678999	150.816
chrVII	687300	687999	74.2902
chrVII	693150	693699	73.8366
chrVII	700600	700999	48.4248
chrVII	701400	702049	43.855
chrVII	702550	703549	114.623
chrVII	706650	706999	42.903
chrVII	713450	713999	41.5018
chrVII	732300	734549	196.875
chrVII	737800	738349	64.2524
chrVII	739150	739899	69.2775
chrVII	754200	754649	39.2258
chrVII	765850	766249	80.1683
chrVII	766500	767349	136.649
chrVII	771350	771999	35.283
chrVII	773800	774249	41.535
chrVII	774450	774999	96.2968
chrVII	779650	780099	103.08
chrVII	785700	786199	53.1955
chrVII	788550	788949	41.6529
chrVII	795150	795949	51.7609
chrVII	809650	811399	160.217
chrVII	821950	822599	41.0113
chrVII	823500	823849	45.6903
chrVII	830300	830749	49.7537
chrVII	835450	835899	44.9626
chrVII	848700	849549	133.881
chrVII	856500	857449	146.903
chrVII	857650	858699	75.1421
chrVII	874800	875499	82.7792
chrVII	878100	878749	65.1358
chrVII	879150	879749	43.2875
chrVII	882300	882699	92.1406
chrVII	893550	894499	78.9615
chrVII	894650	894999	45.2686
chrVII	904200	904699	48.2182
chrVII	905050	905549	57.7679
chrVII	905750	906349	52.4814
chrVII	910250	910649	44.8357
chrVII	919100	919849	46.1698
chrVII	938450	939299	72.9432
chrVII	942250	942599	41.4213
chrVII	944550	944949	42.7751
chrVII	947100	947549	45.618
chrVII	953300	953599	44.677
chrVII	958200	959699	164.766
chrVII	968900	969499	84.0873
chrVII	974200	974649	79.7978
chrVII	986250	986899	35.6836
chrVII	987000	987999	89.4412
chrVII	989950	990749	117.172
chrVII	993650	994649	122.262
chrVII	995200	995699	51.3488
chrVII	999650	1000399	105.159
chrVII	1004300	1004799	43.4303
chrVII	1007250	1007599	35.689
chrVII	1010150	1010849	42.7125
chrVII	1011150	1012149	186.449
chrVII	1027200	1027499	35.7793
chrVII	1042850	1043449	46.0084
chrVII	1050450	1050799	85.7876
chrVII	1051900	1052399	82.4326
chrVII	1062800	1063199	36.2568
chrVII	1064850	1065399	71.161
chrVII	1065550	1066099	63.9722
chrVII	1072950	1073349	49.625
chrVII	1080850	1081599	52.7194
chrVII	1087350	1087849	52.968
chrI	20150	20849	47.7593
chrI	20950	21549	36.5989
chrI	29950	30599	53.2739
chrI	31650	32099	41.1465
chrI	32200	33049	69.082
chrI	44950	45349	34.4235
chrI	48400	49049	101.449
chrI	67600	69449	199.716
chrI	69700	71049	147.428
chrI	73500	73849	36.0264
chrI	79600	79899	37.4491
chrI	108300	108649	59.3327
chrI	113150	114599	135.038
chrI	135800	136149	48.4248
chrI	138200	138899	66.2626
chrI	143500	144299	96.6003
chrI	150500	151399	163.748
chrI	152200	152549	39.4447
chrI	154900	155299	45.6586
chrI	182050	182549	51.6538
chrI	184650	185049	49.711
chrI	188800	189149	72.7562
chrI	189800	190099	33.5428
chrI	191550	191999	45.1652
chrI	192100	192449	39.1945
chrI	198500	199199	87.3229
chrI	217000	217399	34.8893
chrI	223250	223649	44.2912
chrI	227150	227449	42.7549
chrVIII	200	599	34.2561
chrVIII	3100	3399	33.8903
chrVIII	6050	6549	46.7161
chrVIII	13100	13599	34.3689
chrVIII	16500	17549	108.906
chrVIII	17700	18749	137.561
chrVIII	21050	21749	66.1749
chrVIII	25850	26349	34.1973
chrVIII	48450	49049	40.5709
chrVIII	53900	55199	147.602
chrVIII	55450	56149	61.4263
chrVIII	73850	74549	59.9926
chrVIII	97550	98199	86.9094
chrVIII	101800	102399	48.2909
chrVIII	105250	105599	74.7916
chrVIII	105750	106599	65.8872
chrVIII	108400	108999	70.9126
chrVIII	114700	115449	149.135
chrVIII	121900	122699	99.6675
chrVIII	131350	131799	50.3184
chrVIII	134450	134799	47.7921
chrVIII	158750	159349	46.156
chrVIII	170200	170599	34.9744
chrVIII	172650	173049	40.5513
chrVIII	180000	180749	63.1091
chrVIII	183950	184449	40.2726
chrVIII	189150	190399	129.915
chrVIII	261850	262349	37.5926
chrVIII	266950	267249	53.2315
chrVIII	281400	281799	41.615
chrVIII	289500	290149	84.2877
chrVIII	290250	290649	38.5345
chrVIII	293750	294349	84.0726
chrVIII	297100	297799	49.2979
chrVIII	298250	299199	116.253
chrVIII	301600	302899	129.254
chrVIII	319900	320249	43.5063
chrVIII	327900	328549	40.6183
chrVIII	331850	332549	59.9672
chrVIII	335650	336349	55.8184
chrVIII	337950	338399	44.9789
chrVIII	342300	342749	59.5812
chrVIII	345500	346299	66.3084
chrVIII	352650	352899	40.9841
chrVIII	354500	354949	58.8805
chrVIII	357550	358399	60.7193
chrVIII	363750	364499	55.6353
chrVIII	371450	372049	52.6377
chrVIII	374550	375399	99.2957
chrVIII	379200	379999	73.0937
chrVIII	384600	385149	66.9998
chrVIII	396400	396849	46.1697
chrVIII	429050	429649	74.1741
chrVIII	452750	453149	79.3151
chrVIII	453600	454199	60.3861
chrVIII	455100	455699	38.8516
chrVIII	455850	456749	71.0965
chrVIII	459150	459599	55.5279
chrVIII	472650	472999	52.7073
chrVIII	483300	483899	56.0036
chrVIII	488550	488849	34.0927
chrVIII	502250	502699	33.419
chrVIII	516950	517349	66.0806
chrVIII	537750	538349	52.6932
chrVIII	553650	554049	43.9944
chrVIII	557000	557649	77.2356
